# Supplementary material for: Development and evaluation of an efficient training program to facilitate the adoption of a novel neurorehabilitation device
Source: PubMed Central journal article supplement — J Rehabil Assist Technol Eng. 2023 Feb 14;10:20556683231158552. doi: 10.1177/20556683231158552 (PMC9932764; doi:10.1177/20556683231158552), 2023-02-14
Supplement: sj-pdf-1-jrt-10.1177_20556683231158552.pdf [file sj-pdf-1-jrt-10.1177_20556683231158552.pdf]

## Supplement A. Interview questions

I am creating a training program for therapists to learn how to use a new wearable rehabilitation device named TheraBracelet. The following questions will give me an idea of what therapists are looking for in a training program.

1. How much time would you be willing to spend for the initial training for TheraBracelet?
  - a. 30 min
  - b. 1 hour
  - c. 2 hours
  - d. 3 hours
  - e. Other (please specify) \_\_\_\_\_
2. When would be the best time for a training?
  - a. Before 8:00am
  - b. 12:00-1:00pm (lunchtime)
  - c. After 4:00PM
  - d. Other (please specify)\_\_\_\_\_
3. Which would be the best day of the week? Mon, Tues, Weds, Thurs, Fri, Sat, Sun
4. Please rate your preference
  - a. Setting for Synchronous
    - a. In person training
    - b. Video conferencing (zoom)
    - c. either
  - b. Group size
    - a. 1-on-1 session
    - b. Small group session (3-15)
    - c. Large group session (15+)
5. Give me an example of a training you have done in the past that you felt went really well and why.
6. Give me an example of a training you have done in the past that you felt went really poorly and why.

## Supplement B. Quiz questions

- 1) Annie G. Has survived a R CVA resulting in L hemiplegia. Annie has no voluntary movement in her L arm or hand. Annie does have some light touch sensation in her L side. Is Annie appropriate for using TheraBracelet?
  
- 2) Johnnie has survived a L side CVA. He has a mild aphasia and cognitive deficits but is able to accurately respond yes/no. He is able to move his R arm and hand, and Mod A for feeding. Is he appropriate for TheraBracelet use?
  
- 3) Name 1 possible outcome that a patient may experience after using TheraBracelet.
